# Supplementary material
Source: ML conference proceedings conference paper supplement (https://proceedings.mlr.press/v97/duncker19a.html)
Supplement: Supplementary file 1 [file duncker19a-supp.pdf]

---

## Supplementary Material: Learning interpretable continuous-time models of latent stochastic dynamical systems

---

Lea Duncker<sup>1</sup> Gergö Böhner<sup>1</sup> Julien Boussard<sup>2</sup> Maneesh Sahani<sup>1</sup>

### A. Variational Lower Bound

We derive a variational lower bound to the marginal log-likelihood of our model using Jensen's inequality

$$\begin{aligned} \log p(\mathbf{y}|\boldsymbol{\theta}) &= \log \int d\mathbf{x} d\mathbf{f} d\mathbf{u} p(\mathbf{y}|\mathbf{x}) p(\mathbf{x}|\mathbf{f}) p(\mathbf{f}|\mathbf{u}, \boldsymbol{\theta}) p(\mathbf{u}|\boldsymbol{\theta}) \\ &\geq \int d\mathbf{x} d\mathbf{f} d\mathbf{u} q(\mathbf{x}, \mathbf{f}, \mathbf{u}) \log \frac{p(\mathbf{y}|\mathbf{x}) p(\mathbf{x}|\mathbf{f}) p(\mathbf{f}|\mathbf{u}, \boldsymbol{\theta}) p(\mathbf{u}|\boldsymbol{\theta})}{q(\mathbf{x}, \mathbf{f}, \mathbf{u})} \\ &\stackrel{\text{def}}{=} \mathcal{F}^* \end{aligned}$$

where  $p(\mathbf{f}|\mathbf{u}, \boldsymbol{\theta}) p(\mathbf{u}|\boldsymbol{\theta}) = \prod_k p(f_k|\mathbf{u}_k, \boldsymbol{\theta}) p(\mathbf{u}_k|\boldsymbol{\theta})$ . Choosing a factorised variational distribution of the form

$$q(\mathbf{x}, \mathbf{f}, \mathbf{u}) = q_x(\mathbf{x}) \prod_k p(f_k|\mathbf{u}_k, \boldsymbol{\theta}) q_u(\mathbf{u}_k)$$

we can rewrite the bound as

$$\begin{aligned} \mathcal{F}^* &= \int d\mathbf{x} d\mathbf{f} d\mathbf{u} q(\mathbf{x}, \mathbf{f}, \mathbf{u}) \log \frac{p(\mathbf{y}|\mathbf{x}) p(\mathbf{x}|\mathbf{f}) \prod_k p(\mathbf{u}_k|\boldsymbol{\theta})}{q_x(\mathbf{x}) \prod_k q_u(\mathbf{u}_k)} \\ &= \langle \log p(\mathbf{y}|\mathbf{x}) \rangle_{q_x} - \langle \text{KL}[q_x(\mathbf{x})||p(\mathbf{x}|\mathbf{f})] \rangle_{q_f} \\ &\quad - \sum_k \text{KL}[q_u(\mathbf{u}_k)||p(\mathbf{u}_k)] \end{aligned}$$

where

$$q_f(\mathbf{f}) = \prod_k \int d\mathbf{u}_k p(f_k|\mathbf{u}_k, \boldsymbol{\theta}) q_u(\mathbf{u}_k)$$

and  $q_x(\mathbf{x})$  is described by (3) and (4). We can derive the Kullback-Leibler divergence between the distributions over SDE paths  $q_x(\mathbf{x})$  and  $p(\mathbf{x}|\mathbf{f})$  by discretising time in steps of  $\Delta t$ . The discretised paths have Markovian structure with

$$\begin{aligned} p(\mathbf{x}_{t+1}|\mathbf{x}_t, \mathbf{f}) &= \mathcal{N}(\mathbf{x}_{t+1}|\mathbf{x}_t + \mathbf{f}(\mathbf{x}_t)\Delta t, \Sigma\Delta t) \\ q_x(\mathbf{x}_{t+1}|\mathbf{x}_t) &= \mathcal{N}(\mathbf{x}_{t+1}|\mathbf{x}_t + \mathbf{f}_q(\mathbf{x}_t)\Delta t, \Sigma\Delta t) \end{aligned}$$

We can hence write

$$\begin{aligned} \text{KL}[q_x(\mathbf{x})||p(\mathbf{x})] &= \sum_{t=1}^{T-1} \int d\mathbf{x}_t q(\mathbf{x}_t) \int d\mathbf{x}_{t+1} q(\mathbf{x}_{t+1}|\mathbf{x}_t) \log \frac{q(\mathbf{x}_{t+1}|\mathbf{x}_t)}{p(\mathbf{x}_{t+1}|\mathbf{x}_t)} \\ &= \frac{1}{2} \sum_{t=1}^{T-1} \Delta t \langle (\mathbf{f} - \mathbf{f}_q)^\top \Sigma^{-1} (\mathbf{f} - \mathbf{f}_q) \rangle_{q_x} \end{aligned}$$

Taking the limit as  $\Delta t \rightarrow 0$ , we obtain

$$\text{KL}[q_x(\mathbf{x})||p(\mathbf{x})] = \frac{1}{2} \int_{\mathcal{T}} dt \langle (\mathbf{f} - \mathbf{f}_q)^\top \Sigma^{-1} (\mathbf{f} - \mathbf{f}_q) \rangle_{q_x}$$

### B. Inference Details

#### B.1. Lagrangian

The full Lagrangian, after applying integration by parts to the constraints in (8), has the form

$$\begin{aligned} \mathcal{L} &= \mathcal{F}^* - \mathcal{C}_1 - \mathcal{C}_2 \\ \mathcal{C}_1 &= \int_{\mathcal{T}} dt \left( \text{Tr} \left[ \Psi (\mathbf{A} \mathbf{S}_x + \mathbf{S}_x \mathbf{A}^\top - I) - \frac{d\Psi}{dt} \mathbf{S}_x \right] \right) \\ &\quad + \text{Tr} [\Psi(T) \mathbf{S}_x(T)] - \text{Tr} [\Psi(0) \mathbf{S}_x(0)] \\ \mathcal{C}_2 &= \int_{\mathcal{T}} dt \left( \boldsymbol{\lambda}^\top (\mathbf{A} \mathbf{m}_x - \mathbf{b}) - \frac{d\boldsymbol{\lambda}^\top}{dt} \mathbf{m}_x \right) \\ &\quad + \boldsymbol{\lambda}(T)^\top \mathbf{m}_x(T) - \boldsymbol{\lambda}(0)^\top \mathbf{m}_x(0) \end{aligned}$$

For the variational free energy term  $\mathcal{F}^*$ , we have from before

$$\mathcal{F} = \sum_i \langle \log p(\mathbf{y}_i|\mathbf{x}_i) \rangle_{q_x} - \text{KL}[q_x(\mathbf{x})||p(\mathbf{x})]$$

and

$$\mathcal{F}^* = \langle \mathcal{F} \rangle_{q_f} - \sum_{k=1}^K \text{KL}[q_u(\mathbf{u}_k)||p(\mathbf{u}_k|\boldsymbol{\theta})]$$

The Kullback-Leibler divergences can be evaluated as

$$\begin{aligned} \text{KL}[q(\mathbf{u}_k)||p(\mathbf{u}_k|\boldsymbol{\theta})] &= \frac{1}{2} \left( \text{Tr} [\boldsymbol{\Omega}_u^{-1} \mathbf{S}_u^k] - M + \log \frac{|\boldsymbol{\Omega}_u|}{|\mathbf{S}_u^k|} \right) \\ &\quad + (\boldsymbol{\mu}_u^k - \mathbf{m}_u^k)^\top \boldsymbol{\Omega}_u^{-1} (\boldsymbol{\mu}_u^k - \mathbf{m}_u^k) \end{aligned}$$

with

$$\begin{aligned} \boldsymbol{\Omega}_u &= \mathbf{K}_{zz} - \tilde{\mathbf{K}}_{zs} \tilde{\mathbf{K}}_{ss}^{-1} \tilde{\mathbf{K}}_{sz} \\ \boldsymbol{\mu}_u^k &= \tilde{\mathbf{K}}_{zs} \tilde{\mathbf{K}}_{ss}^{-1} \mathbf{v}_k^\theta \end{aligned}$$

and

$$\langle \text{KL}[q_x(\mathbf{x})||p(\mathbf{x})] \rangle_{q_f} = \frac{1}{2} \int_0^T dt \langle (\mathbf{f} - \mathbf{f}_q)^\top (\mathbf{f} - \mathbf{f}_q) \rangle_{q_x q_f}$$

For later convenience, we denote this term as

$$\langle \text{KL}[q_x(\mathbf{x}) \| p(\mathbf{x})] \rangle_{q_f} = \mathcal{E}(\mathbf{m}_x, \mathbf{S}_x)$$

Using the identity

$$\langle \langle \mathbf{f} \rangle_{q_f} (\mathbf{x} - \mathbf{m}_x)^\top \rangle_{q_x} = \left\langle \frac{\partial \langle \mathbf{f} \rangle_{q_f}}{\partial \mathbf{x}} \right\rangle_{q_x} \mathbf{S}_x$$

the integrand can be evaluated as

$$\begin{aligned} & \langle (\mathbf{f} - \mathbf{f}_q)^\top (\mathbf{f} - \mathbf{f}_q) \rangle_{q_x q_f} \\ &= \langle \mathbf{f}^\top \mathbf{f} \rangle_{q_x q_f} + 2\text{Tr} \left[ \mathbf{A}^\top \left\langle \frac{\partial \mathbf{f}}{\partial \mathbf{x}} \right\rangle_{q_x q_f} \mathbf{S}(t) \right] \\ & \quad + \text{Tr} \left[ \mathbf{A}^\top \mathbf{A} (\mathbf{S}_x + \mathbf{m}_x \mathbf{m}_x^\top) \right] + 2 \mathbf{m}_x^\top \mathbf{A}^\top \langle \mathbf{f} \rangle_{q_x q_f} \\ & \quad + \mathbf{b}^\top \mathbf{b} - 2\mathbf{b}^\top \langle \mathbf{f} \rangle - 2\mathbf{b}^\top \mathbf{A} \mathbf{m}_x \end{aligned}$$

For the expected log-likelihood terms, in general, there will be terms that are continuous in  $\mathbf{x}$ , and terms that depend only on evaluations of  $\mathbf{x}$  at specific locations  $t_i$ , which we will denote by  $\ell^{cont}$  and  $\ell^{jump}$ , respectively. We can write

$$\langle \log p(\mathbf{y} | \mathbf{x}) \rangle_{q_x} = \ell^{cont}(\mathbf{m}_x, \mathbf{S}_x) + \ell^{jump}(\mathbf{m}_x, \mathbf{S}_x)$$

Thus, the variational free energy can be expressed as

$$\begin{aligned} \mathcal{F}^* &= \ell^{cont}(\mathbf{m}_x, \mathbf{S}_x) + \ell^{jump}(\mathbf{m}_x, \mathbf{S}_x) - \mathcal{E}(\mathbf{m}_x, \mathbf{S}_x) \\ & \quad - \sum_{k=1}^K \text{KL}[q_u(\mathbf{u}_k) \| p(\mathbf{u}_k | \boldsymbol{\theta})] \end{aligned}$$

### B.1.1. EXAMPLE: GAUSSIAN LIKELIHOOD

In the case of a Gaussian likelihood, there is no continuous term in the likelihood:

$$\begin{aligned} \ell^{cont} &= 0 \\ \ell^{jump} &= \sum_i \int_{\mathcal{T}_0}^{\mathcal{T}_{end}} dt \delta(t - t_i) (\mathbf{m}_x(t)^\top \mathbf{C}^\top \Gamma^{-1} (\mathbf{y}_t - \mathbf{d}) \\ & \quad - \frac{1}{2} \text{Tr} \left[ \mathbf{C}^\top \Gamma^{-1} \mathbf{C} \sum_i (\mathbf{S}_x(t) + \mathbf{m}_x(t) \mathbf{m}_x(t)^\top) \right]) \end{aligned}$$

### B.1.2. EXAMPLE: MULTIVARIATE POISSON PROCESS LIKELIHOOD

In the case of a multivariate Poisson Process, with  $g(\cdot) = \exp(\cdot)$  and observed event times  $t_1^{(n)}, \dots, t_{\phi(n)}^{(n)}$  for the  $n$ th output dimension:

$$\begin{aligned} \ell^{cont} &= - \sum_n \int_{\mathcal{T}_0}^{\mathcal{T}_{end}} \exp \left( \mathbf{c}_n^\top \mathbf{m}_x + \frac{1}{2} \mathbf{c}_n^\top \mathbf{S}_x \mathbf{c}_n \right) dt \\ \ell^{jump} &= \sum_{n=1}^N \sum_{i=1}^{\phi(n)} \int_{\mathcal{T}_0}^{\mathcal{T}_{end}} (\mathbf{c}_n^\top \mathbf{m}_x(t) + d_n) \delta(t - t_i^{(n)}) dt \end{aligned}$$

## B.2. Symmetric variations in $\mathbf{S}_x$

To arrive at the fixed point equations given in the main paper, we need to take variational derivatives of the Lagrangian with respect to  $\mathbf{m}_x$  and  $\mathbf{S}_x$ . In contrast to Archambeau et al. (2007), we take the symmetric variations in  $\mathbf{S}_x$  into account. Also note that the Lagrange multiplier  $\Psi$  is symmetric. We can write

$$\frac{\partial \mathcal{C}_1}{\partial \mathbf{S}_x} = \left( \Psi \mathbf{A} + \mathbf{A}^\top \Psi - \frac{d\Psi}{dt} \right) \odot \tilde{\mathbb{P}}$$

where  $\odot$  denotes the elementwise Hadamard product and  $\tilde{\mathbb{P}}_{ij} = 2$  for  $i \neq j$  and 1 otherwise. Differentiating the entire Lagrangian with respect to the symmetric matrix  $\mathbf{S}_x$  and setting to zero we get

$$0 = \frac{\partial \mathcal{F}^*}{\partial \mathbf{S}_x} \odot \mathbb{P} - \Psi \mathbf{A} - \mathbf{A}^\top \Psi + \frac{d\Psi}{dt}$$

matching the equation given in the main text with  $\mathbb{P}_{ij} = \frac{1}{2}$  if  $i \neq j$  and 1 otherwise. Note that the derivatives of the free energy with respect to  $\mathbf{S}_x$  will also need to take into account the symmetry of the covariance matrix. The derivations for (20)-(22) follow those of Archambeau et al. (2007).

## B.3. Expected values of dynamics

The inference algorithm requires evaluating several expectations with respect to  $q_x$  and  $q_f$ . Let  $\mathbf{U} = [\mathbf{u}_1 \dots \mathbf{u}_K]$  and  $\langle \mathbf{U} \rangle_{q_u} = \mathbf{M}_u$ , such that we can define  $(M + L + LK) \times K$  matrices stacking all inducing variables, zero function values, and Jacobians as

$$\mathbf{U}_{u, f_s, J} = \begin{bmatrix} \mathbf{U}_u \\ \mathbf{0} \\ \mathbf{J}_s^{(1)} \\ \vdots \\ \mathbf{J}_s^{(L)} \end{bmatrix}, \quad \langle \mathbf{U}_{u, f_s, J} \rangle_{q_u} = \mathbf{M}_{u, f_s, J} = \begin{bmatrix} \mathbf{M}_u \\ \mathbf{0} \\ \mathbf{J}_s^{(1)} \\ \vdots \\ \mathbf{J}_s^{(L)} \end{bmatrix}$$

The required expectations can then be evaluated as

$$\langle \mathbf{f}(\mathbf{x}) \rangle_{q_x q_f}^\top = \langle \mathbf{a}_z^\theta(\mathbf{x}) \rangle_{q_x} \mathbf{M}_{u, f_s, J}$$

$$\left\langle \frac{\partial \mathbf{f}(\mathbf{x})}{\partial \mathbf{x}} \right\rangle_{q_x q_f}^\top = \langle \nabla_x \mathbf{a}_z^\theta(\mathbf{x}) \rangle_{q_x} \mathbf{M}_{u, f_s, J}$$

$$\langle \mathbf{f}(\mathbf{x})^\top \mathbf{f}(\mathbf{x}) \rangle_{q_x q_f} = \sum_k \langle f_k^2(\mathbf{x}) \rangle_{q_x q_f} = \kappa(\mathbf{x}, \mathbf{x}')$$

$$+ \text{Tr} \left[ \left( \langle \mathbf{U}_{u, f_s, J} \mathbf{U}_{u, f_s, J}^\top \rangle_{q_u} - \mathbf{K}_{zz}^\theta \right) \langle \mathbf{a}_z^\theta(\mathbf{x})^\top \mathbf{a}_z^\theta(\mathbf{x}) \rangle_{q_x} \right]$$

The above expressions still involve computing expectations of covariance functions and their derivatives, which can be computed analytically for choices such as the exponentiated quadratic covariance function.

## B.4. Inference algorithm

The full inference algorithm involves solving a set of ODEs forward and backward in time, which we do using the forward Euler method. We provide the full approach in Algorithm 1, where the subscript  $r$  denotes the evaluation of the functions at the  $r$ th point of the time grid between  $\mathcal{T}_0$  and  $\mathcal{T}_{end}$  taking steps of size  $\Delta t$ . Note that the derivatives of the terms in  $\ell^{jump}$  will need to be discretized appropriately as well. Using the same time-grid as was used for solving the ODEs, the delta-functions will contribute a factor of  $\frac{1}{\Delta t}$ , such that the  $\Delta t$  terms cancel in the update written in Algorithm 1.

## C. Learning Details

### C.1. Conditioned Sparse Gaussian Process dynamics

The only term in the variational free energy that depends on the parameters in  $\mathbf{f}$  are the KL-divergence between the continuous-time processes and the KL-divergence relating to the inducing points for  $\mathbf{f}$ .

#### C.1.1. INDUCING POINT COVARIANCES

Collecting the terms that contain  $\mathbf{S}_u^k$  we have

$$\begin{aligned} \frac{\partial}{\partial \mathbf{S}_u^k} \text{KL}[q(\mathbf{u}_k) \| p(\mathbf{u}_k | \boldsymbol{\theta})] &= \frac{1}{2} \boldsymbol{\Omega}_u^{-1} - \frac{1}{2} \mathbf{S}_u^k{}^{-1} \\ \frac{\partial \mathcal{E}}{\partial \mathbf{S}_u^k} &= \frac{1}{2} \int_{\mathcal{T}} dt \frac{\partial}{\partial \mathbf{S}_u^k} \text{Tr} \left[ \begin{bmatrix} \mathbf{S}_u^k & 0 \\ 0 & 0 \end{bmatrix} \langle \mathbf{a}_z^\theta(\mathbf{x})^\top \mathbf{a}_z^\theta(\mathbf{x}) \rangle_{q_x} \right] \\ &= \frac{1}{2} \int_{\mathcal{T}} dt [\langle \mathbf{a}_z^\theta(\mathbf{x})^\top \mathbf{a}_z^\theta(\mathbf{x}) \rangle_{q_x}]_{:M,:M} \end{aligned}$$

where the last line selects the first  $M \times M$  block from  $\langle \mathbf{a}_z^\theta(\mathbf{x})^\top \mathbf{a}_z^\theta(\mathbf{x}) \rangle_{q_x}$ . We hence obtain the closed form update

$$\mathbf{S}_u^k = \left( \boldsymbol{\Omega}_u^{-1} + \int_{\mathcal{T}} dt [\langle \mathbf{a}_z^\theta(\mathbf{x})^\top \mathbf{a}_z^\theta(\mathbf{x}) \rangle_{q_x}]_{:M,:M} \right)^{-1}$$

#### C.1.2. INDUCING POINTS AND JACOBIANS

To find the update efficiently, let  $\mathbf{J}_k = [\mathbf{J}_{k,:}^{(1)}, \dots, \mathbf{J}_{k,:}^{(L)}]^\top$  so that we can write

$$\boldsymbol{\mu}_u^k = \tilde{\mathbf{K}}_{zs} \tilde{\mathbf{K}}_{ss}^{-1} \mathbf{v}_k^\theta = \tilde{\mathbf{K}}_{zs} \tilde{\mathbf{K}}_{ss}^{-1} \begin{bmatrix} \mathbf{0} \\ \mathbf{J}_k \end{bmatrix} = \mathbf{G} \mathbf{J}_k$$

We can rewrite the quadratic terms in the Kullback-Leibler divergences of the inducing points as

$$\begin{aligned} &\sum_k (\boldsymbol{\mu}_u^k - \mathbf{m}_u^k)^\top \boldsymbol{\Omega}_u^{-1} (\boldsymbol{\mu}_u^k - \mathbf{m}_u^k) \\ &= \sum_k \begin{bmatrix} \mathbf{m}_u^k \\ \mathbf{J}_k \end{bmatrix}^\top \begin{bmatrix} \boldsymbol{\Omega}_u^{-1} & -\boldsymbol{\Omega}_u^{-1} \mathbf{G} \\ -\mathbf{G}^\top \boldsymbol{\Omega}_u^{-1} & \mathbf{G}^\top \boldsymbol{\Omega}_u^{-1} \mathbf{G} \end{bmatrix} \begin{bmatrix} \mathbf{m}_u^k \\ \mathbf{J}_k \end{bmatrix} \\ &= \text{Tr} \left[ \mathbf{M}_{u,J}^\top \tilde{\boldsymbol{\Omega}} \mathbf{M}_{u,J} \right] \end{aligned}$$

with  $\mathbf{M}_{u,J} = \begin{bmatrix} \mathbf{m}_u^1 & \dots & \mathbf{m}_u^K \\ \mathbf{J}_1 & \dots & \mathbf{J}_K \end{bmatrix}$  and derivative

$$\begin{aligned} \frac{\partial}{\partial \mathbf{M}_{u,J}} \sum_k \text{KL}[q(\mathbf{u}_k) \| p(\mathbf{u}_k | \boldsymbol{\theta})] &= \tilde{\boldsymbol{\Omega}} \mathbf{M}_{u,J} \\ \frac{\partial \mathcal{E}}{\partial \mathbf{M}_{u,J}} &= \int_{\mathcal{T}} dt [\langle \mathbf{a}_z^\theta(\mathbf{x})^\top \mathbf{a}_z^\theta(\mathbf{x}) \rangle_{q_x}]_{[i,i]} \mathbf{M}_{u,J} \\ &\quad + \int_{\mathcal{T}} dt [\langle \nabla_x \mathbf{a}_z^\theta(\mathbf{x}) \rangle_{q_x}]_{[:,i]}^\top \mathbf{S}_x \mathbf{A}^\top \\ &\quad - \int_{\mathcal{T}} dt [\langle \mathbf{a}_z^\theta(\mathbf{x}) \rangle_{q_x}]_{[:,i]}^\top (-\mathbf{A} \mathbf{m}_x + \mathbf{b})^\top \end{aligned}$$

Putting all terms together, we obtain the update

$$\mathbf{M}_{u,J} = \mathbf{B}_1^{-1} (\mathbf{B}_2 - \mathbf{B}_3)$$

with

$$\begin{aligned} \mathbf{B}_1 &= \left( \tilde{\boldsymbol{\Omega}} + \int_{\mathcal{T}} dt [\langle \mathbf{a}_z^\theta(\mathbf{x})^\top \mathbf{a}_z^\theta(\mathbf{x}) \rangle_{q_x}]_{[uj,uj]} \right) \\ \mathbf{B}_2 &= \int_{\mathcal{T}} dt [\langle \mathbf{a}_z^\theta(\mathbf{x}) \rangle_{q_x}]_{[:,uj]}^\top \langle \mathbf{f}_q \rangle_{q_x}^\top \\ \mathbf{B}_3 &= \int_{\mathcal{T}} dt [\langle \nabla_x \mathbf{a}_z^\theta(\mathbf{x}) \rangle_{q_x}]_{[:,uj]}^\top \mathbf{S}_x \mathbf{A}^\top \end{aligned}$$

and we have defined an indexing operation where  $[X]_{[uj,uj]}$  selects the first  $M \times M$  and last  $LK \times LK$  block of  $X$  and  $[X]_{[:,uj]}$  selects the first  $M$  and last  $LK$  columns of  $X$ . Hence, this selects the appropriate block matrices for the updates. The one-dimensional integrals can be computed efficiently using Gauss-Legendre quadrature.

### C.2. Sparse Gaussian Process dynamics

Similarly, closed form updates are available in the simpler case, when  $\mathbf{f}$  is modelled by a classic sparse Gaussian Process, i.e. using inducing points without the additional conditioning on fixed points and Jacobians.

$$\begin{aligned} \mathbf{S}_u^k &= \mathbf{K}_{zz} \left( \mathbf{K}_{zz} + \int_{\mathcal{T}} dt \langle \boldsymbol{\kappa}(\mathbf{Z}, \mathbf{x}) \boldsymbol{\kappa}(\mathbf{x}, \mathbf{Z}) \rangle_{q_x} \right)^{-1} \mathbf{K}_{zz} \\ \mathbf{M}_u &= \mathbf{S}_u^k \mathbf{K}_{zz}^{-1} \left( \int_{\mathcal{T}} dt \boldsymbol{\Phi}_1 \mathbf{f}_q^\top - \int_{\mathcal{T}} dt \boldsymbol{\Phi}_{d1} \mathbf{S}_x \mathbf{A}^\top \right) \end{aligned}$$

Where  $\boldsymbol{\Phi}_1 = \langle k(\mathbf{x}, \mathbf{Z}) \rangle_{q_x}$  and  $\boldsymbol{\Phi}_{d1} = \langle \frac{\partial}{\partial \mathbf{x}} k(\mathbf{x}, \mathbf{Z}) \rangle_{q_x}$ .

### C.3. Linear dynamics

Our modelling framework also easily extends to other parameterisation of  $\mathbf{f}$ . For example, in a continuous-time linear dynamical system with  $\mathbf{f}(\mathbf{x}) = -\tilde{\mathbf{A}}\mathbf{x} + \tilde{\mathbf{b}}$  direct minimisation of the KL-divergence between the continuous-time

**Algorithm 1** Inference algorithm

---

**Input:** data  $\{y_i, t_i\}_{i=1}^T$ ,  $\mathbf{m}_{x,0}$ ,  $\mathbf{S}_{x,0}$ ,  $q_f(\mathbf{f})$ ,  $\Delta t$ ,  $\mathcal{T}_0$ ,  $\mathcal{T}_{end}$   
 Initialize  $\mathbf{A}(t)$ ,  $\mathbf{b}(t)$   
 $R = \frac{\mathcal{T}_0 - \mathcal{T}_{end}}{\Delta t}$   
**repeat**  
   **for**  $r = 0$  **to**  $R - 1$  **do**  
      $\mathbf{m}_{x,r+1} \leftarrow \mathbf{m}_{x,r} - \Delta t (\mathbf{A}_r \mathbf{m}_{x,r} - \mathbf{b}_r)$   
      $\mathbf{S}_{x,r+1} \leftarrow \mathbf{S}_{x,r} - \Delta t (\mathbf{A}_r \mathbf{S}_{x,r} + \mathbf{S}_{x,r} \mathbf{A}_r^\top - I)$   
   **end for**  
   **for**  $r = R$  **to**  $1$  **do**  
      $\lambda_{r-1} \leftarrow \lambda_r - \Delta t \left( \mathbf{A}_r^\top \lambda_r + \left( \frac{\partial \ell^{cont}}{\partial \mathbf{m}_x} - \frac{\partial \mathcal{E}}{\partial \mathbf{m}_x} \right) \Big|_{t=r\Delta t} \right) - \Delta t \frac{\partial \ell^{jump}}{\partial \mathbf{m}_x} \Big|_{t=(r-1)\Delta t}$   
      $\Psi_{r-1} \leftarrow \Psi_r - \Delta t \left( \mathbf{A}_r^\top \Psi_r + \Psi_r \mathbf{A}_r + \mathbb{P} \odot \left( \frac{\partial \ell^{cont}}{\partial \mathbf{S}_x} - \frac{\partial \mathcal{E}}{\partial \mathbf{S}_x} \right) \Big|_{t=r\Delta t} \right) - \Delta t \mathbb{P} \odot \frac{\partial \ell^{jump}}{\partial \mathbf{S}_x} \Big|_{t=(r-1)\Delta t}$   
   **end for**  
    $\mathbf{A} = \left\langle \frac{\partial \mathbf{f}}{\partial \mathbf{x}} \right\rangle_{q_x q_f} + 2\Psi$   
    $\mathbf{b} = \langle \mathbf{f}(\mathbf{x}) \rangle_{q_x q_f} + \mathbf{A} \mathbf{m}_x - \lambda$   
**until** convergence in  $\mathcal{F}^*$   
**return:**  $\{\mathbf{A}_r, \mathbf{b}_r, \lambda_r, \Psi_r, \mathbf{m}_{x,r}, \mathbf{S}_{x,r}\}_{r=1}^R$

---

processes leads to the closed form updates

$$\tilde{\mathbf{A}} = \left( \int_{\mathcal{T}} dt (\mathbf{b}(\mathbf{x})^\top - \langle \mathbf{f}_q(\mathbf{x}) \mathbf{x}^\top \rangle) \right) \left( \int_{\mathcal{T}} dt \langle \mathbf{x} \mathbf{x}^\top \rangle \right)^{-1}$$

$$\tilde{\mathbf{b}} = \frac{1}{T} \int_{\mathcal{T}} dt (\langle \mathbf{f}_q(\mathbf{x}) \rangle + \mathbf{A}(\mathbf{x}))$$

reminiscent of the update equations for the generative parameters of a discrete-time Linear Dynamical System.

#### C.4. Output mapping

We consider an observation model of the form

$$\mathbf{y}(t_i) = \mathbf{C} \mathbf{x}(t_i) + \mathbf{d} + \epsilon_i$$

where  $\epsilon_i \sim \mathcal{N}(\epsilon|0, \Gamma)$ . Dropping all terms that are constant in  $\mathbf{C}$ ,  $\mathbf{d}$  from the expression for the variational free energy, we have

$$\mathcal{F}^* = -\frac{1}{2} \sum_t \left\langle (\mathbf{y}_t - \mathbf{C} \mathbf{x}_t - \mathbf{d})^\top \Gamma^{-1} (\mathbf{y}_t - \mathbf{C} \mathbf{x}_t - \mathbf{d}) \right\rangle_{q_x}$$

Differentiating and setting to zero gives

$$\mathbf{C}^{new} = \left( \sum_t (\mathbf{y}_t - \mathbf{d}) \mathbf{m}_t^\top \right) \left( \sum_t (\mathbf{S}_{x,t} + \mathbf{m}_{x,t} \mathbf{m}_{x,t}^\top) \right)^{-1}$$

$$\mathbf{d}^{new} = \frac{1}{T} \sum_t (\mathbf{y}_t - \mathbf{C}^{new} \mathbf{m}_{x,t})$$

#### D. Chemical reaction dynamics

The dynamical system used to generate the data in section 5.4 is of the form

$$\frac{d[\mathbf{I}^-]_A}{dt} = (k_a [\mathbf{I}^-]_A + k_b [\mathbf{I}^-]_A^2) (S_0 - [\mathbf{I}^-]_A) + \frac{F_1 [\mathbf{I}^-]_0}{V_A} - \frac{(F_3 + F_4) [\mathbf{I}^-]_A}{V_A} + \frac{F_4 [\mathbf{I}^-]_D}{V_A}$$

$$\frac{d[\mathbf{I}^-]_D}{dt} = (k_a [\mathbf{I}^-]_D + k_b [\mathbf{I}^-]_D^2) (S_0 - [\mathbf{I}^-]_D) + \frac{F_4 [\mathbf{I}^-]_A}{V_D} - \frac{F_4 [\mathbf{I}^-]_D}{V_D}$$

To generate the simulations, we use the parameter settings

$$\begin{aligned} [\mathbf{I}^-]_0 &= 4.4 \times 10^{-5} & k_0 &= 2.7 \times 10^{-3} \\ V_A &= 4 \times 10^1 & F_4 &= 3.25 \times 10^{-3} \\ V_D &= 1 & F_3 &= k_0 V_A \\ k_a &= 2.1425 \times 10^{-1} & F_1 &= \frac{1}{2} F_3 \\ k_b &= 2.1425 \times 10^4 & F_2 &= \frac{1}{2} F_3 \\ S_0 &= \frac{1}{2} ([\mathbf{I}^-]_0 + 1.42 \times 10^{-3}) \end{aligned}$$

#### References

Archambeau, C., Cornford, D., Opper, M., and Shawe-Taylor, J. Gaussian process approximations of stochastic differential equations. *Journal of machine learning research*, 1:1–16, 2007.
